# Supplementary material for: Hibernation of Secession Tensions in Catalonia: Attenuation Trends on Antagonistic Alignments
Source: MDPI journal article supplement (doi:10.3390/genealogy7020036), 2023-05-10
Supplement: s1 [file s1]

## Supplementary Information

### Supplementary Figures.

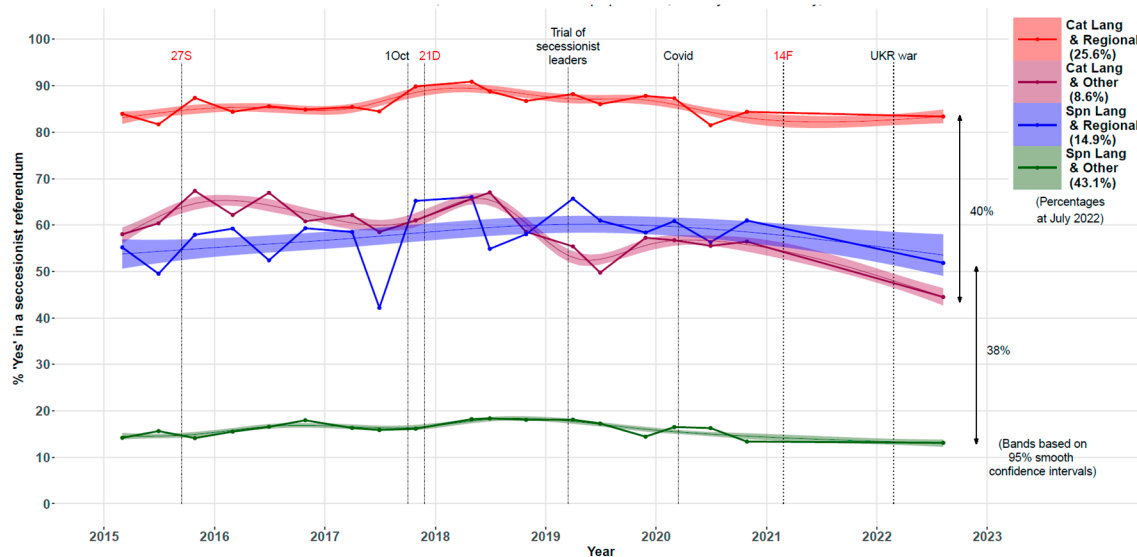

**Figure S1. Percentages of citizens responding YES/NO to a direct question about secession from Spain, in a hypothetical referendum of self-determination, segmented by family language and regional media consumption.** At March 2015 survey, there were 44.1% of 'Yes' responses of the entire population; at November 2022 survey, 41.6%. (CEO Barometer Political Opinion, <http://ceo.gencat.cat/ca/barometre/>, accessed on 10 January 2023; this question was introduced from 2015 onwards). Red words-numbers (27S,...) at top of all the Figures indicate dates of successive regional elections.

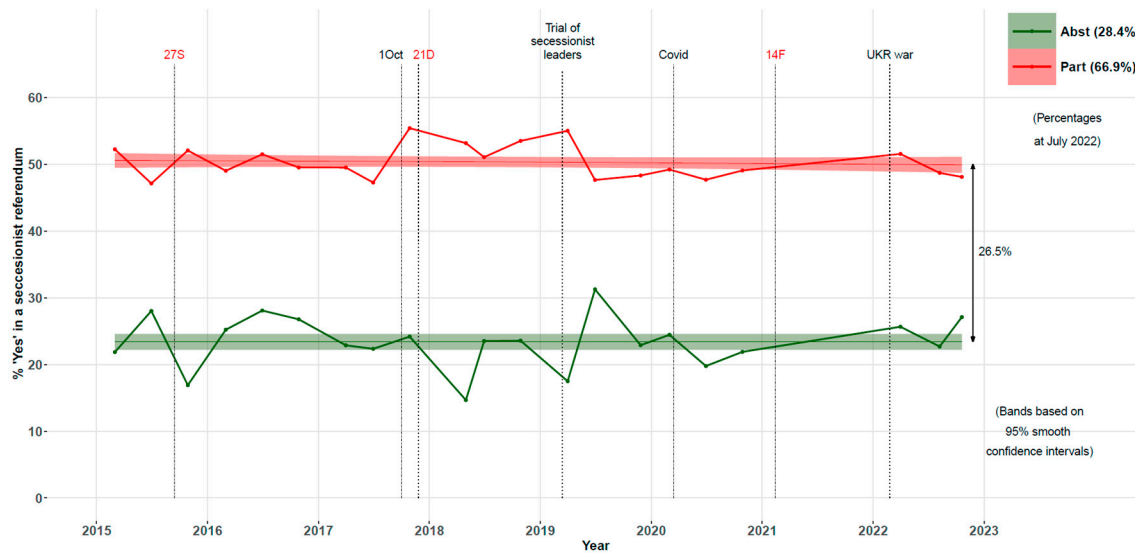

**Figure S2. Percentages of citizens responding YES/NO to a direct question about secession from Spain in a hypothetical referendum of self-determination, segmented by participation (remembered) at the regional elections.** At March 2015 survey, there were 44.1% of 'Yes' responses of the entire population; at November 2022 survey, 41.6%. (CEO Barometer Political Opinion, <http://ceo.gencat.cat/ca/barometre/>, accessed on 10 January 2023; this question was introduced from 2015 onwards). Red words-numbers (27S,...) at top of all the Figures indicate dates of successive regional elections.
